# Supplementary material for: Association of Albumin-Corrected Serum Calcium Levels with Colorectal Cancer Survival Outcomes
Source: MDPI journal article supplement (doi:10.3390/jcm11102928), 2022-05-22
Supplement: s1 [file s1]

**Supplemental Table S3.** Body composition and inflammatory indexes according to calcium tertiles of stage I-III colorectal cancer patients.

| Characteristic                                        | All-patients, n=125     | Calcium<br><9.44 mg/dl<br>n=94  | Calcium<br>>9.44 mg/dl<br>n=31 | P value                  |
|-------------------------------------------------------|-------------------------|---------------------------------|--------------------------------|--------------------------|
| <b>Skeletal Muscle</b>                                |                         |                                 |                                |                          |
| Area (cm <sup>2</sup> ), mean (SD)                    | 129.5 (35.6)            | 131.6 (36.4)                    | 123.1 (32.4)                   | 0.252 <sup>a</sup>       |
| SMI (cm <sup>2</sup> /m <sup>2</sup> ), mean (SD)     | 49.3 (10.9)             | 49.8 (11.1)                     | 47.7 (10.5)                    | 0.363 <sup>a</sup>       |
| Attenuation (HU), mean (SD)                           | 32.4 (9.5)              | 32.0 (9.5)                      | 33.7 (9.6)                     | 0.382 <sup>a</sup>       |
| IMAT, area (cm <sup>2</sup> ), median (IQR)           | 8.1 (4.7–10.0)          | 10.4 (6.9–15.9)                 | 9.2 (6.2–15.0)                 | <b>0.016<sup>b</sup></b> |
| <b>Visceral adipose tissue</b>                        |                         |                                 |                                |                          |
| VAT, area (cm <sup>2</sup> ), median (IQR)            | 125.8 (62.2–191.3)      | 130.9 (65.5–212.0)              | 119.6 (49.4–168.3)             | 0.121 <sup>b</sup>       |
| VATI (cm <sup>2</sup> /m <sup>2</sup> ), median (IQR) | 50.9 (25.7–75.0)        | 53.6 (26.4–80.3)                | 42.7 (21–63.1)                 | 0.179 <sup>b</sup>       |
| VAT attenuation (HU), median (IQR)                    | -96.1 (-101.7 to -84.8) | -96.5 (-102.7 to -84.8)         | -94.0 (-98.8 to -85.2)         | 0.339 <sup>b</sup>       |
| <b>Subcutaneous adipose tissue</b>                    |                         |                                 |                                |                          |
| SAT, area (cm <sup>2</sup> ), median (IQR)            | 129.7 (87.5–191.1)      | 131.2 (85.1–198.0)              | 127.0 (87.5–182.0)             | 0.810 <sup>b</sup>       |
| SATI (cm <sup>2</sup> /m <sup>2</sup> ), median (IQR) | 46.0 (33.8–77.9)        | 45.6 (33.0–79.7)                | 48.4 (34.7–75.7)               | 0.914 <sup>b</sup>       |
| SAT attenuation (HU), median (IQR)                    | -98.3 (-105.4 to -89.9) | -98.6 (-105.8 to -92.1)         | -96.7 (-102.1 to -87.6)        | 0.278 <sup>b</sup>       |
| Characteristic                                        | All-patients, n=295     | Calcium<br><9.44 mg/dl<br>n=216 | Calcium<br>>9.44 mg/dl<br>n=79 | P value                  |
| <b>Inflammatory indexes</b>                           |                         |                                 |                                |                          |
| NLR, median (IQR)                                     | 2.4 (1.7–3.8)           | 2.6 (1.8–4.0)                   | 2.1 (1.5–2.8)                  | <b>0.005<sup>b</sup></b> |
| PLR, median (IQR)                                     | 137.7 (106.9–202.0)     | 140.0 (106.9–206.1)             | 133.9 (106.8–197.2)            | 0.501 <sup>b</sup>       |
| LMR, median (IQR)                                     | 3.2 (2.2–4.4)           | 3.0 (2–4.3)                     | 3.5 (2.5–4.4)                  | <b>0.025<sup>b</sup></b> |

Abbreviations: IMAT: Intramuscular adipose tissue; IQR: interquartile range; LMR: lymphocyte-to-monocyte ratio; NLR: neutrophil-to-lymphocyte ratio; PLR: platelet-to-lymphocyte ratio; SAT: subcutaneous adipose tissue; SATI: Subcutaneous Fat Index; SD: Standard deviation; SMI: Skeletal Muscle Index; VAT: Visceral adipose tissue; VATI: Visceral Fat Index. <sup>a</sup>Student's T test, <sup>b</sup>Mann Whitney's test.
