# Supplementary material for: Association of Albumin-Corrected Serum Calcium Levels with Colorectal Cancer Survival Outcomes
Source: MDPI journal article supplement (doi:10.3390/jcm11102928), 2022-05-22
Supplement: s1 [file s1]

**Supplemental Table S2.** Body composition and inflammatory indexes according to calcium tertiles of metastatic colorectal cancer patients.

| Characteristic                                        | All-patients, n=79      | Low tertile, n=28<br>7.18–8.98 | Middle tertile, n=29<br>9.00–9.44 | High tertile, n=22<br>9.46–14.24 | P value                  |
|-------------------------------------------------------|-------------------------|--------------------------------|-----------------------------------|----------------------------------|--------------------------|
| <b>Skeletal Muscle</b>                                |                         |                                |                                   |                                  |                          |
| Area (cm <sup>2</sup> ), mean (SD)                    | 130.1 (30.8)            | 129.8 (30.4)                   | 134.5 (32.4)                      | 124.6 (29.8)                     | 0.908 <sup>a</sup>       |
| SMI (cm <sup>2</sup> /m <sup>2</sup> ), mean (SD)     | 47.8 (9.2)              | 47.9 (10.4)                    | 49.5 (8.8)                        | 45.5 (7.8)                       | 0.370 <sup>a</sup>       |
| Attenuation (HU), mean (SD)                           | 32.6 (9.8)              | 33.7 (9.1)                     | 30.4 (9.5)                        | 34.0 (11.1)                      | 0.579 <sup>a</sup>       |
| IMAT, area (cm <sup>2</sup> ), median (IQR)           | 9.0 (5.6–13.4)          | 8.5 (5.5–11.1)                 | 10.0 (7.2–17.1)                   | 7.6 (5.5–11.0)                   | 0.152 <sup>b</sup>       |
| <b>Visceral adipose tissue</b>                        |                         |                                |                                   |                                  |                          |
| VAT, area (cm <sup>2</sup> ), median (IQR)            | 81.1 (45.0–138.8)       | 76.1 (37.9–136.2)              | 117.4 (53.4–158.7)                | 80.8 (41.9–118.4)                | 0.320 <sup>b</sup>       |
| VATI (cm <sup>2</sup> /m <sup>2</sup> ), median (IQR) | 29.8 (17.9–48.4)        | 28.3 (14.6–47.1)               | 38.8 (19.2–58.5)                  | 29.8 (14.3–40.5)                 | 0.320 <sup>b</sup>       |
| VAT attenuation (HU), median (IQR)                    | -90.8 (-97.2 to -83.3)  | -90.2 (-97.1 to -82.0)         | -92.4 (-99.5 to -84.8)            | -91.0 (-96.7 to -83.3)           | 0.524 <sup>b</sup>       |
| <b>Subcutaneous adipose tissue</b>                    |                         |                                |                                   |                                  |                          |
| SAT, area (cm <sup>2</sup> ), median (IQR)            | 129.9 (81.7–214.2)      | 126.3 (82.6–180.9)             | 134.6 (86.6–239.1)                | 112.2 (77.6–241.0)               | 0.638 <sup>b</sup>       |
| SATI (cm <sup>2</sup> /m <sup>2</sup> ), median (IQR) | 48.4 (29.7–73.7)        | 48.3 (28.7–64.7)               | 52.1 (32.6–86.8)                  | 43.8 (29.7–88.1)                 | 0.615 <sup>b</sup>       |
| SAT attenuation (HU), median (IQR)                    | -98.6 (-106.8 to -90.7) | -97.2 (-106.4 to -88.7)        | -101.4 (-106.8 to -92.7)          | -98.2 (-104.7 to -90.7)          | 0.743 <sup>b</sup>       |
| Characteristic                                        | All-patients, n=253     | Low tertile, n=84<br>7.18–8.98 | Middle tertile, n=80<br>9.00–9.44 | High tertile, n=89<br>9.46–14.24 | P value                  |
| <b>Inflammatory indexes</b>                           |                         |                                |                                   |                                  |                          |
| NLR, median (IQR)                                     | 3.3 (2.2–5.1)           | 2.7 (1.9–4.1)                  | 3.3 (2.2–4.7)                     | 3.9 (2.5–6.5)                    | <b>0.002<sup>b</sup></b> |
| PLR, median (IQR)                                     | 173.4 (128.1–276.4)     | 165.1 (111.3–231.8)            | 170.3 (128.7–243.3)               | 224.0 (137.6–340.1)              | <b>0.004<sup>b</sup></b> |
| LMR, median (IQR)                                     | 2.6 (1.8–3.6)           | 2.8 (1.9–4.0)                  | 2.5 (1.8–3.6)                     | 2.2 (1.7–3.1)                    | 0.051 <sup>b</sup>       |

Abbreviations: IMAT: Intramuscular adipose tissue; IQR: interquartile range; LMR: lymphocyte-to-monocyte ratio; NLR: neutrophil-to-lymphocyte ratio; PLR: platelet-to-lymphocyte ratio; SAT: subcutaneous adipose tissue; SATI: Subcutaneous Fat Index; SD: Standard deviation; SMI: Skeletal Muscle Index; VAT: Visceral adipose tissue; VATI: Visceral Fat Index. <sup>a</sup>ANOVA oneway test, <sup>b</sup>Kruskal Wallis's test.
