# Supplementary material for: Association of Albumin-Corrected Serum Calcium Levels with Colorectal Cancer Survival Outcomes
Source: MDPI journal article supplement (doi:10.3390/jcm11102928), 2022-05-22
Supplement: s1 [file s1]

**Supplemental Table S1.** Selected demographic and disease characteristics according to calcium levels of stage I-III colorectal cancer patients.

| Characteristic                           | All-patients,<br>n=297 | Calcium<br><9.44 mg/dl<br>n=217 | Calcium<br>>9.44 mg/dl<br>n=80 | P value            |
|------------------------------------------|------------------------|---------------------------------|--------------------------------|--------------------|
| <b>Age, № (%)</b>                        |                        |                                 |                                |                    |
| <55                                      | 80 (26.9)              | 63 (29.0)                       | 17 (21.3)                      | 0.377 <sup>a</sup> |
| 55-70                                    | 137 (46.1)             | 96 (44.2)                       | 41 (51.3)                      |                    |
| >70                                      | 80 (26.9)              | 58 (26.7)                       | 22 (27.5)                      |                    |
| <b>Sex, № (%)</b>                        |                        |                                 |                                |                    |
| Female                                   | 155 (52.2)             | 125 (57.6)                      | 30 (37.5)                      | 0.002 <sup>a</sup> |
| Male                                     | 142 (47.8)             | 92 (42.4)                       | 50 (62.5)                      |                    |
| <b>BMI, median (IQR)</b>                 |                        |                                 |                                |                    |
| <18.5                                    | 20 (6.7)               | 16 (7.4)                        | 4 (5.0)                        | 0.763 <sup>a</sup> |
| 18.5-24.9                                | 125 (42.1)             | 88 (40.6)                       | 37 (46.3)                      |                    |
| 25-29.9                                  | 96 (32.3)              | 70 (32.3)                       | 26 (32.5)                      |                    |
| ≥30                                      | 56 (18.9)              | 43 (19.8)                       | 13 (16.3)                      |                    |
| <b>Weight loss, № (%)</b>                |                        |                                 |                                |                    |
| <5%                                      | 112 (38.4)             | 84 (39.3)                       | 28 (35.9)                      | 0.233 <sup>a</sup> |
| 5-10%                                    | 79 (27.1)              | 58 (27.1)                       | 21 (26.9)                      |                    |
| >10%                                     | 101 (34.6)             | 72 (33.6)                       | 29 (37.2)                      |                    |
| <b>Alcohol consumption, № (%)</b>        | 129 (43.7)             | 90 (41.9)                       | 39 (48.8)                      | 0.289 <sup>a</sup> |
| <b>Smoking, № (%)</b>                    | 91 (30.9)              | 67 (31)                         | 24 (30.4)                      | 0.216 <sup>a</sup> |
| <b>Charlson comorbidity index, № (%)</b> |                        |                                 |                                |                    |
| 2-3                                      | 105 (35.4)             | 83 (38.3)                       | 22 (27.5)                      | 0.086 <sup>a</sup> |
| ≥ 4                                      | 192 (64.6)             | 134 (61.7)                      | 58 (72.5)                      |                    |
| <b>Stage, № (%)</b>                      |                        |                                 |                                |                    |
| I-II                                     | 166 (55.9)             | 124 (57.1)                      | 42 (52.5)                      | 0.706 <sup>b</sup> |
| III                                      | 115 (38.7)             | 82 (37.8)                       | 33 (41.3)                      |                    |
| TXNXM0                                   | 16 (5.4)               | 11 (5.1)                        | 5 (6.3)                        |                    |
| <b>CEA, Median (IQR)</b>                 | 4.5 (2.2–13.0)         | 4 (2.2–13.6)                    | 5.0 (2.3–10.6)                 | 0.719 <sup>c</sup> |
| <b>Emergency surgery, № (%)</b>          | 24 (8.1)               | 20 (9.2)                        | 4 (5.1)                        | 0.338 <sup>b</sup> |
| <b>Neoadjuvant treatment, № (%)</b>      | 213 (71.7)             | 151 (69.6)                      | 62 (77.5)                      | 0.179 <sup>a</sup> |
| <b>Adjuvant treatment, № (%)</b>         | 176 (59.5)             | 133 (61.3)                      | 43 (54.4)                      | 0.288 <sup>a</sup> |

Abbreviations: BMI: Body mass index; CEA: carcinoembryonic antigen; IQR: interquartile range

<sup>a</sup>Chi square test, <sup>b</sup>Fisher's exact test, <sup>c</sup>Mann Whitney's test.
